# Supplementary material
Source: PubMed Central journal article supplement (PMC4011465)
Supplement: supp_82.17.1556_e-References.pdf [file supp_82.17.1556_e-References.pdf]

## E-References

- e1. Zadikoff C, Wasia PM, Miyasaki J, et al. Cannabinoid, CB1 agonists in cervical dystonia: Failure in a phase IIa randomized controlled trial. *Basal Ganglia* 2011;1:91–95.
- e2. Cunha JM, Carlini EA, Pereira AE, et al. Chronic administration of cannabidiol to healthy volunteers and epileptic patients. *Pharmacology* 1980;21:175–185.
- e3. Ames FR, Cridland S. Anticonvulsant effect of cannabidiol. *S Afr Med J* 1986;69:14.
- e4. Gloss D, Vickery B. Cannabinoids for epilepsy. *Cochrane Database of Systemic Reviews* 2012 Jun 13;6:CD009270.
- e5. Ghaffar O, Feinstein A. Multiple sclerosis and cannabis: a cognitive and psychiatric study. *Neurology* 2008;71:164–169.
- e6. Honarmand K, Tierney MC, O'Connor P, Feinstein A. Effects of cannabis on cognitive function in patients with multiple sclerosis. *Neurology* 2011;76:1153–1160.
- e7. Sadovnick AD, Eisen K, Ebers GC, Paty DW. Cause of death in patients attending multiple sclerosis clinics. *Neurology* 1991;41:1193–1196.
- e8. Consroe P, Musty R, Rein J, Tillery W, Pertwee R. The perceived effects of smoked cannabis on patients with multiple sclerosis. *Eur Neurol* 1997;38:44–48.
- e9. Wright S, Ducombe P, Altman D. Assessment of blinding to treatment allocation in studies of a cannabis-based medicine (Sativex®) in people with multiple sclerosis: a new approach. *Trials* 2012;13:189–200.
- e10. Wilsey B, Marcotte T, Tsodikov A, et al. A randomized, placebo-controlled, crossover trial of cannabis cigarettes in neuropathic pain. *J Pain* 2008;9:506–521.
- e11. Porter BE, Jacobson C. Report of a parent survey of cannabidiol-enriched cannabis use in pediatric treatment-resistant epilepsy. *Epilepsy Behav* 2013;29:574–577.
- e12. Abrams DI, Jay CA, Shade SB, et al. Cannabis in painful HIV-associated sensory neuropathy: a randomized placebo-controlled trial. *Neurology* 2007;68:515–521.
- e13. Ellis RJ, Toperoff W, Vaida F, et al. Smoked medicinal cannabis for neuropathic pain in HIV: a randomized placebo-controlled trial. *Neuropsychopharmacology* 2009;34:672–680.
- e14. Ware MA, Want T, Shapiro S, et al. Smoked cannabis for chronic neuropathic pain: a randomized controlled trial. *CMAJ* 2010;182:E694–E701.
- e15. Blackburn M, van Vliet P, Mockett SP. Reliability of measurements obtained with the modified Ashworth scale in the lower extremities of people with stroke. *Phys Ther* 2002;82:25–34.
- e16. Zajicek J, Ball S, Wright D, et al. Effect of dronabinol on progression in progressive multiple sclerosis (CUPID): a randomized, placebo-controlled trial. *Lancet Neurol* 2013;12:857–865.
- e17. American Academy of Neurology. 2004. *Clinical Practice Guideline Process Manual*, 2004 Ed. St. Paul, MN: The American Academy of Neurology.
- e18. Marsden CD, Schachter M. Assessment of extrapyramidal disorders. *Br J Clin Pharmacol* 1981;11:129–151.

- e19. Cummings JL, Mega M, Gray K, Rosenberg-Thompson S, Carusi DA, Gornbein J. The Neuropsychiatric Inventory: comprehensive assessment of psychopathology in dementia. *Neurology* 1994;44:2308–2314.
- e20. Leckman JF, Towbin KE, Ort SI, et al. Clinical assessment of tic disorder severity. In: Cohen DJ, Bruun RD, Leckman JF, eds. *Tourette's Syndrome and Tic Disorders*. New York, NY: John Wiley & Sons;1988:55–78.
- e21. Shapiro AK, Shapiro ES, Young JG, et al. Signs, symptoms, and clinical course. In: Shapiro AK, Shapiro ES, Young JG, et al, eds. *Gilles de la Tourette Syndrome*. 2nd ed. New York, NY: Raven Press;1988:127–193.
- e22. Harcherik DF, Leckman JF, Detlor J, et al. A new instrument for clinical studies of Tourette's syndrome. *Am J Acad Child Psychiatry* 1984;23:153–160.
- e23. Gronwall DM. Paced auditory serial-addition task a measure of recovery from concussion. *Percept Mot Skills* 1977;44:367–373.
- e24. Kurtzke JF. Rating neurologic impairment in multiple sclerosis: an expanded disability status scale (EDSS). *Neurology* 1983;30:299–302.
- e25. Burke RE, Fahn S, Marsden CD, Bressman SB, Moskowitz C, Friedman J. Validity and reliability of a rating scale for the primary torsion dystonias. *Neurology* 1985;35:73–77.
